# Supplementary material
Source: PubMed Central journal article supplement (PMC10524351)
Supplement: NIHMS1902796-supplement-ADRN02_Online_Repository_text.pdf [file NIHMS1902796-supplement-ADRN02_Online_Repository_text.pdf]

1 **Online Repository**

2 Eric L. Simpson MD, M.C.R.<sup>1</sup>, Anna De Benedetto MD<sup>2</sup>, Mark Boguniewicz MD<sup>3</sup>, Peck Y. Ong  
3 MD<sup>4</sup>, Stephanie Lussier MS<sup>5</sup>, Miguel Villarreal MS<sup>5</sup>, Lynda C. Schneider MD<sup>6</sup>, Amy S. Paller  
4 MD<sup>7</sup>, Emma Guttman-Yassky MD, PhD<sup>8</sup>, Jon M. Hanifin MD<sup>1</sup>, Jonathan M. Spergel MD<sup>9</sup>,  
5 Kathleen C. Barnes PhD<sup>10</sup>, Gloria David PhD<sup>5</sup>, Briahna Austin, MS<sup>5</sup>, Donald Y.M. Leung MD,  
6 PhD<sup>3</sup>, Lisa A. Beck MD<sup>11</sup>

7  
8 Affiliations: <sup>1</sup>Department of Dermatology, Oregon Health & Science University, Portland, OR.  
9 simpson@ohsu.edu & hanifinj@ohsu.edu, <sup>2</sup> Department of Dermatology, University of  
10 Rochester School of Medicine and Dentistry. anna\_debenedetto@urmc.rochester.edu <sup>3</sup>Division  
11 of Allergy-Immunology, Department of Pediatrics, National Jewish Health and University of  
12 Colorado School of Medicine, Denver, CO. boguniewicz@njhealth.org &  
13 [LeungD@njhealth.org](mailto:LeungD@njhealth.org), <sup>4</sup>Division of Clinical Immunology and Allergy, Children's Hospital Los  
14 Angeles; Dept of Pediatrics, University Southern California. PYong@chla.usc.edu, <sup>5</sup>Rho, Inc.  
15 Durham, NC. Stephanie\_Lussier@rhoworld.com, mavillarreal@hotmail.com,  
16 gloria\_david@rhoworld.com, & Briahna\_Austin@rhoworld.com, <sup>6</sup>Division of Allergy-  
17 Immunology, Boston Children's Hospital, Harvard Medical School, Boston, MA.  
18 lynda.schneider@childrens.harvard.edu, <sup>7</sup>Departments of Dermatology and Pediatrics,  
19 Northwestern University Feinberg School of Medicine, Chicago, IL. APaller@northwestern.edu,  
20 <sup>8</sup>Department of Dermatology, Icahn School of Medicine at Mount Sinai, New York, NY.  
21 emma.guttman@mountsinai.org, <sup>9</sup>Division of Allergy and Immunology, Children's Hospital of  
22 Philadelphia, Department of Pediatrics, Perelman School of Medicine at University of  
23 Pennsylvania, Philadelphia, PA. SPERGEL@email.chop.edu, <sup>10</sup>Department of Medicine and  
24 Epidemiology, University of Colorado Anschutz Medical Campus, Denver, CO.  
25 [KATHLEEN.BARNES@CUANSCHUTZ.edu](mailto:KATHLEEN.BARNES@CUANSCHUTZ.edu), <sup>11</sup>Department of Dermatology, Medicine &  
26 Pathology; University of Rochester Medical Center, Rochester, NY.  
27 Lisa\_beck@urmc.Rochester.edu

28  
29 Corresponding Author: Lisa A. Beck, M.D. University of Rochester, Dept of Dermatology 601  
30 Elmwood Ave, Box 697 Rochester, NY 14642 Phone: 585-275-1039  
31 [Lisa\\_Beck@URMC.ROCHESTER.EDU](mailto:Lisa_Beck@URMC.ROCHESTER.EDU)

32

- 33 I. Methodologic Details
- 34 II. Standard Diagnostic Criteria used in ADRN02 Registry Study
- 35 III. ADRN02 Case Report Forms
- 36 IV. Table E1. Overview of Atopic Dermatitis Registries
- 37 V. Table E2. Methicillin-Resistant *S. aureus*
- 38 VI. Table E3. Further Details from Physical Exam
- 39 VII. Table E4. Bacterial Infection History
- 40 VIII. *Fig E1. The Rajka-Langeland severity (RJL) scores. The Rajka-Langeland severity (RJL)*  
41 *scores were highly correlated with Eczema Area and Severity Index (EASI) scores*  
42 *obtained at the same visit.*
- 43 IX. *Fig E2. Venn Diagram of the number of participants in each AD RJL severity categories*  
44 *that were S. aureus culture positive at either lesional, non-lesional or at both sites. A.*  
45 *Mild AD; B. Moderate AD; C. Severe AD; D. Overall AD.*
- 46

## References

- E1. Silverberg JI, Lei D, Yousaf M, Janmohamed SR, Vakharia PP, Chopra R, et al. *Measurement properties of the Rajka-Langeland severity score in children and adults with atopic dermatitis.* Br J Dermatol. 2021;**184**(1):87-95.
- E2. Eichenfield F, Hanifin J, Luger T, Stevens S, Pride H. Consensus Conference on Pediatric Atopic Dermatitis. J Am Acad Dermatology 2003;49:1088-95.
- E3. DermAtlas, Johns Hopkins University; 2000-2005, Bernard A. Cohen, MD, Christoph U. Lehmann, MD; <http://www.DermAtlas.org>
- E4. Fulginiti in Fitzpatrick's Dermatology in General Medicine, 6th ed. McGraw Hill, 2003 (modified).
