# Supplementary material
Source: PubMed Central journal article supplement (PMC10524351)

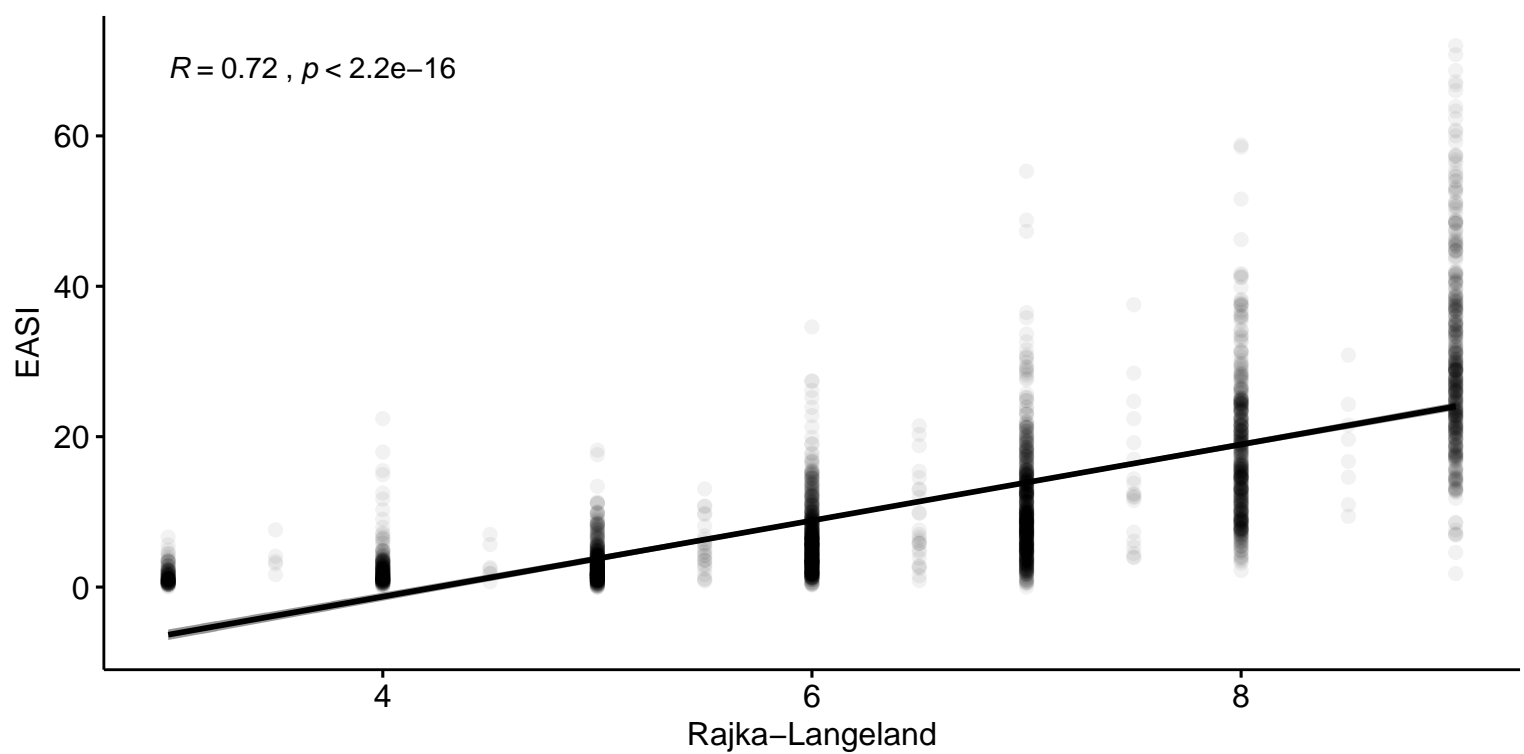

Supplement: NIHMS1902796-supplement-Figure_E1_EASI_RL_correlation.pdf [file NIHMS1902796-supplement-Figure_E1_EASI_RL_correlation.pdf]

Mild

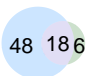

Moderate

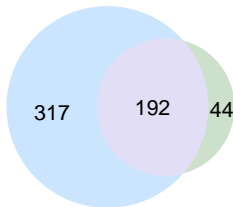

Severe

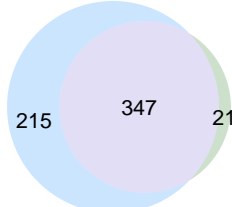

All Severities

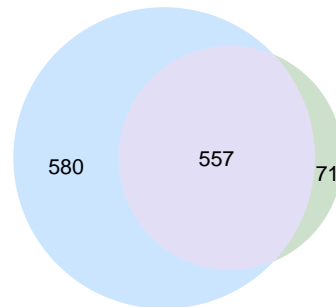

● Lesional  
● Non-Lesional

Supplement: NIHMS1902796-supplement-Figure_E2_Venn_Diagram.pdf [file NIHMS1902796-supplement-Figure_E2_Venn_Diagram.pdf]
